1 **Title**

2 **Modelling cancer immunomodulation using epithelial organoid cultures**

3

4 **Authors**

5 Yotam E. Bar-Ephraim<sup>1,2,8</sup>, Kai Kretzschmar<sup>1,2,8</sup>, Priyanca Asra<sup>1,2</sup>, Evelien de Jongh<sup>1,2</sup>, Kim E.  
6 Boonekamp<sup>1,2</sup>, Jarno Drost<sup>3</sup>, Joost van Gorp<sup>4</sup>, Apollo Pronk<sup>5</sup>, Niels Smakman<sup>5</sup>, Inez J. Gan<sup>6</sup>,  
7 Zsolt Sebestyén<sup>6</sup>, Jürgen Kuball<sup>6</sup>, Robert G.J. Vries<sup>7</sup>, Hans Clevers<sup>1,2,3\*</sup>

8

9 <sup>1</sup>Oncode Institute, Hubrecht Institute, Royal Netherlands Academy for Arts and Sciences  
10 (KNAW) and University Medical Centre (UMC) Utrecht, the Netherlands

11 <sup>2</sup>UMC Utrecht, Cancer Genomics Netherlands, Utrecht, the Netherlands

12 <sup>3</sup>Princess Máxima Centre for Paediatric Oncology, Utrecht, the Netherlands

13 <sup>4</sup>Department of Pathology, Diaconessenhuis hospital, Utrecht, the Netherlands

14 <sup>5</sup>Department of Surgery, Diaconessenhuis hospital, Utrecht, the Netherlands

15 <sup>6</sup>Laboratory of Translational Immunology, Department of Immunology, UMC, Utrecht, the  
16 Netherlands

17 <sup>7</sup>Foundation Hubrecht Organoid Technology (HUB), Utrecht, the Netherlands

18 <sup>8</sup>These authors contributed equally: Yotam E. Bar-Ephraim, Kai Kretzschmar

19

20 \*Corresponding author, e-mail: [h.clevers@hubrecht.eu](mailto:h.clevers@hubrecht.eu)

21

22 **Here we utilize organoid technology to study immune-cancer interactions and assess**  
23 **immunomodulation by colorectal cancer (CRC). Transcriptional profiling and flow**  
24 **cytometry revealed that organoids maintain differential expression of**  
25 **immunomodulatory molecules present in primary tumours. Finally, we established a**  
26 **method to model antigen-specific epithelial cell killing and cancer immunomodulation in**  
27 **vitro using CRC organoids co-cultured with cytotoxic T cells (CTLs).**

28

29 CRC is among the most common cancers worldwide<sup>1</sup>. While early CRC stages are highly  
30 treatable by surgical removal, later stages are usually incurable<sup>2</sup>. CRC arises through a multi-  
31 step process from small lesions of the epithelium of the large intestine. These lesions grow into  
32 adenomas with low grade dysplasia that progress into high grade dysplasia, eventually giving  
33 rise to infiltrating carcinomas<sup>3</sup>. Genetic mutations in signalling pathways such as the canonical  
34 Wnt signalling are the molecular basis of CRC<sup>4</sup>. However, the interaction of the tumour with

Bar-Ephraim, Kretzschmar et al.

35 its microenvironment is another critical hallmark<sup>5</sup>. Cancer cells remodel their  
36 microenvironment (e.g. fibroblasts, the vasculature and immune cells) to support tumour  
37 growth<sup>6</sup>. Infiltrating immune cells (ICs) such as CTLs or macrophages play a crucial role by  
38 generating different immune responses such as anti-tumour cytotoxicity (the former) or  
39 tumour-promoting chronic inflammation (the latter)<sup>7</sup>. As such, escape from the surveilling  
40 immune system has been recognised as one of the hallmarks of cancer<sup>5</sup>. Cancer cells undergo  
41 a process called immunoediting and silence anti-tumour responses, for example, by preventing  
42 T-cell activation through stimulation of inhibitory cell surface receptors such as CTL-  
43 associated antigen (CTLA)-4 or programmed death (PD)1<sup>6,8</sup>. Overcoming this active  
44 immunomodulation by tumour cells has become a major therapeutic target<sup>9</sup>. However, tumour  
45 heterogeneity, such as differential CTL infiltration or differential expression of immune  
46 inhibiting factors, could influence therapeutic efficiency of anti-tumour drugs by mediating  
47 drug resistance<sup>6</sup>. Developing *ex vivo* model systems to characterise the communication of the  
48 tumour with its environment is therefore of great importance. Organoid cultures grown from  
49 different epithelial tissues serve as an excellent tool to study tissue homeostasis and disease<sup>10</sup>.  
50 Furthermore, organoid biobanks of multiple epithelial organ systems have been established and  
51 tumour-derived organoids have successfully been used as platforms for screenings of different  
52 drugs to predict patient response<sup>11</sup>. Here we describe the establishment of a method to model  
53 antigen-specific epithelial-cell killing and cancer immunomodulation and *in vitro* using CRC  
54 organoids co-cultured with CTLs.

55

56 We first assessed whether CRC organoids expressed immunomodulatory molecules in  
57 established long-term expanded cultures. To this end, we compared gene expression of T-cell-  
58 specific immunomodulators in CRC organoids to the expression levels found in normal colon  
59 organoids using a transcriptome dataset generated using our ‘living organoid biobank’ of CRC  
60 patients<sup>12</sup>. On average, transcription of genes associated with T-cell stimulation such as  
61 *TNFSF4* or *TNFSF9* was not altered in CRC organoids compared to normal colon organoids  
62 (Fig. 1a). However, expression of human leukocyte antigen (HLA) genes *HLA-A* and *HLA-C*,  
63 encoding major histocompatibility complex class (MHC)-I molecules that present antigens to  
64 T cells, were significantly downregulated in CRC organoids (Fig. 1a), a well-described  
65 phenomenon found in cancers<sup>13</sup>. Expression of genes associated with inhibition of T-cell  
66 function was either significantly upregulated such as *BTLA*, significantly downregulated such  
67 as *CD80*, *CD86* or *LGALS9* or not altered at all such as *CD274* (encoding PD-L1),  
68 *PDCD1LG2* (encoding PD-L2) (Fig. 1a). When assessing expression levels of

Bar-Ephraim, Kretzschmar et al.

69 immunomodulatory molecules on individual organoids, CRC organoids largely clustered  
70 together showing heterogeneous down regulation of *HLA-A*, *HLA-C* and *LGALS9* compared to  
71 healthy colon organoids (Fig. 1b). However, expression of immunoinhibitory genes *CD274*  
72 and *PDCD1LG2*, for instance, was highly upregulated in some CRC organoids in comparison  
73 to the matched normal colon organoid cultures, reflecting previously reported preservation of  
74 tumour heterogeneity in organoids<sup>12</sup> (Fig. 1b). These molecular signatures provide a basis for  
75 further investigation of tumour immunogenicity and its association with other characteristics  
76 of the tumour.

77 Four of the most commonly mutated genes in CRC are *APC*, *P53*, *KRAS* and *SMAD4*,  
78 reflecting the stepwise progression of the normal intestinal epithelium into a metastatic  
79 carcinoma<sup>14</sup>. Introduction of these cancer mutations into human intestinal organoid cultures  
80 using clustered regularly interspaced short palindromic repeats (CRISPR)/Cas9 demonstrated  
81 that this process can be mimicked *in vitro* and upon xenotransplantation into mice<sup>15,16</sup>. Using  
82 colon organoids carrying one or more of these cancer mutations, we investigated whether up-  
83 regulation of PD-L1 was associated with a certain mutational status. Additionally, we exposed  
84 mutant organoids and their wild-type control organoid line to interferon (IFN)- $\gamma$ , which is  
85 secreted by T cells and can trigger increased expression of immunomodulatory molecules such  
86 as PD-L1<sup>17</sup>. Subsequently, we assessed PD-L1 expression by quantitative polymerase chain  
87 reaction (qPCR) and flow cytometry (Fig. 1 c,d). In the absence of IFN- $\gamma$ , organoids carrying  
88 triple (*APC*<sup>KO/KO</sup>, *P53*<sup>KO/KO</sup>, *KRAS*<sup>G12D/+</sup>) and quadruple mutations (*APC*<sup>KO/KO</sup>, *P53*<sup>KO/KO</sup>,  
89 *KRAS*<sup>G12D/+</sup> and *SMAD4*<sup>KO/KO</sup>) showed lower *CD274* gene expression in comparison to control  
90 wild-type organoids (Fig. 1 c). Overall, PD-L1 expression was low in untreated organoid lines  
91 (Fig. 1 c,d). However, PD-L1 expression was dramatically upregulated in IFN- $\gamma$ -treated  
92 organoids both on transcript and protein level (Fig. 1 c,d). These data demonstrate that CRC  
93 organoids express immunomodulators and that this expression is regulated in a similar way as  
94 previously shown for tissue *in vivo*.

95

96 We next aimed at establishing a co-culture system for CRC organoids and CTLs to model  
97 antigen-specific killing of tumour cells *in vitro*. For this, we used  $\alpha\beta$  T cells carrying a  
98 transgenic T-cell receptor (TCR) recognizing an HLA-A2-restricted Wilms tumour (WT)1-  
99 derived peptide<sup>18,19</sup>. We first screened CRC organoids from the ‘living biobank’<sup>12</sup> as well as  
100 newly generated CRC organoids for HLA-A2 expression using flow cytometry. We found  
101 three CRC organoid lines that showed partial downregulation of HLA-A2 (Supplementary Fig.

Bar-Ephraim, Kretzschmar et al.

102 1a). We were able to purify HLA-A2<sup>+</sup> and HLA-A2<sup>-</sup> CRC organoids and successfully  
103 established cultures from both populations (Fig. 2b). We confirmed stable MHC-I  
104 downregulation in HLA-A2<sup>-</sup> CRC organoids, as IFN- $\gamma$  stimulation did not trigger HLA-A2 re-  
105 expression (Supplementary Fig. 1b). Next, we pulsed these CRC organoid lines with WT1  
106 peptide and, subsequently, co-cultured them for 48 hours with peptide-specific T cells.  
107 Following co-culture, we found that HLA-A2<sup>-</sup> CRC organoids did survive irrespective of  
108 whether pulsed with the peptide or not (Fig. 2c). However, only the HLA-A2<sup>+</sup> CRC organoids  
109 without prior peptide incubation survived co-culture (Fig. 2c). Peptide-pulsed HLA-A2<sup>+</sup> CRC  
110 organoids were effectively killed by the peptide-specific T cells providing a proof-of-principle  
111 that organoids can be utilised to study anti-tumour response by cytotoxic T cells *in vitro*.

112 To further confirm antigen-specificity in our ‘killing’ assay system, we improved our  
113 co-culture method by transfecting HLA-A2<sup>+</sup> CRC organoids with a construct expressing  
114 mNeonGreen-tagged histone H2B and staining T cells with CellTracker violet to allow for  
115 long-term tracking of both cell types (Methods). We then pulsed HLA-A2<sup>+</sup> CRC organoids  
116 with either the WT1 peptide or with an EBV-derived peptide (Methods) and co-cultured the  
117 organoids with T cells carrying either a WT1- or an EBV-specific TCR. Here, only organoids  
118 pulsed with the cognate peptide were efficiently killed by the T cells (Fig. 2d, Supplementary  
119 Movies 1 and 2). Testing for IFN- $\gamma$  production by the T cells in the co-culture using enzyme-  
120 linked immunosorbent assay (ELISA) confirmed antigen-specific organoid killing by the T  
121 cells (Fig. 2e). In order to better follow the kinetics of the organoid killing, we applied a  
122 fluorescent dye (NucRed Dead 647; Methods), which specifically stains apoptotic cells, and  
123 performed live confocal imaging on the co-culture (Fig. 2f, Supplementary Movies 1 and 2).  
124 We then quantified organoid killing by assessing co-localisation of NucRed Dead dye with  
125 H2B-mNeonGreen (Methods). Significant co-localisation of both labels and, hence, organoid  
126 killing, was only observed when peptide-pulsed HLA-A2<sup>+</sup> CRC organoids were co-cultured  
127 with the respective peptide-specific T cells (Fig. 2g). Furthermore, T cells infiltrating into the  
128 epithelium of the organoids could be readily detected in this co-culture condition (Fig. 2h).  
129 Finally, we investigated whether using this co-culture system modulation of the immune  
130 response to immunosuppressive tumours can be modelled. Indeed, addition of a blocking  
131 antibody against PD-1 ( $\alpha$ PD-1) enhanced tumour killing and IFN- $\gamma$  production in PD-L1  
132 expressing IFN- $\gamma$  stimulated organoids (Fig. 2i,j). This was not observed when organoids were  
133 not IFN- $\gamma$  stimulated and, hence, did not express PD-1. In conclusion, T cells efficiently killed  
134 co-cultured CRC organoids in an antigen-specific manner. In addition, T-cell inhibition and  
135 subsequent relief of this inhibition using  $\alpha$ PD-1 could be modelled.

Bar-Ephraim, Kretzschmar et al.

136

137 Here we demonstrate that epithelial organoids can be used to faithfully recapitulate the  
138 interaction between tumour tissue and the immune system. Also, using our co-culture assay,  
139 we set a first step in rebuilding the tumour microenvironment *in vitro*. Further addition of other  
140 components of this microenvironment (such as fibroblasts, natural killer cells, myeloid-derived  
141 suppressor cells, B cells) may shed light on the complex interactions between the different cell  
142 types leading to immune evasion of the tumour. Lastly, in line with a recent publication  
143 utilising cancer organoids as a scaffold for T-cell expansion<sup>20</sup>, this co-culture system can be  
144 used as a tool for drug-screens testing applicability of certain immunotherapies, for instance,  
145 chimeric antigen receptor (CAR)- or TCR transgenic T cells, antibody-dependent cell-  
146 mediated cytotoxicity (ADCC) or antibody-dependent cellular phagocytosis (ADCP) inducing  
147 antibodies directed at the tumour, to different tumours and different patients.

148

## 149 **Methods**

### 150 ***Human material and informed consent***

151 Colonic tissues (both normal colon and tumour tissue) were obtained from the Departments of  
152 Surgery and Pathology of the Diaconessenhuis hospital, Utrecht, the Netherlands. All patients  
153 included in this study were diagnosed with CRC. Informed consent was signed by all included  
154 patients. Collection of tissue was approved by the medical ethical committee (METC) of the  
155 Diaconessenhuis hospital, in agreement with the declaration of Helsinki and according to  
156 Dutch and European Union legislation.

157

### 158 ***Organoid generation and cultures***

159 Epithelial organoid lines were derived from healthy colon or tumor tissue as previously  
160 described<sup>12,21</sup>. In brief, healthy colonic crypts were isolated by digestion of the colonic mucosa  
161 in chelation solution (5.6 mM Na<sub>2</sub>HPO<sub>4</sub>, 8.0 mM KH<sub>2</sub>PO<sub>4</sub>, 96.2 mM NaCl, 1.6 mM KCl, 43.4  
162 mM Sucrose, and 54.9 mM D-Sorbitol, Sigma) supplemented with dithiotreitol (0.5 mM,  
163 Sigma) and EDTA (2 mM, in-house), for 30 minutes at 4°C. Colon crypts were subsequently  
164 plated in basement membrane extract (BME; Cultrex PC BME RGF type 2, Amsbio) and  
165 organoids were grown in human intestinal stem cell medium (HISC), which is composed of  
166 Advanced Dulbecco's modified Eagle medium/F12 supplemented with  
167 penicillin/streptomycin, 10 mM HEPES and Glutamax (all Gibco, Thermo Fisher Scientific)  
168 with 50% Wnt3a conditioned medium (in-house), 20% R-Spondin1 conditioned medium (in-  
169 house), 10% Noggin conditioned medium (in-house), 1 x B27, 1,25 mM n-acetyl cysteine, 10

Bar-Ephraim, Kretzschmar et al.

170 mM nicotinamide, 50 ng/mL human EGF, 10 nM Gastrin, 500 nM A83-01, 3  $\mu$ M SB202190,  
171 10 nM prostaglandine E2 and 100  $\mu$ g/mL Primocin (Invivogen). Tumor specimens were  
172 digested to single cells in collagenase II (1 mg/mL, Gibco, Thermo Scientific), supplemented  
173 with hyaluronidase (10  $\mu$ g/mL) and LY27632 (10  $\mu$ M) for 30 minutes at 37°C while shaking.  
174 Single tumor cells were plated in BME and organoids were cultured in HICS minus Wnt  
175 conditioned medium and supplemented with 10  $\mu$ M LY27632 at 37°C.

176

### 177 ***Organoid transfection***

178 CRC organoids were dissociated into small clumps using TrypLE and then transduced with  
179 H2B-mNeonGreen (pLV-H2B-mNeonGreen-ires-Puro), as previously described<sup>22</sup>.

180

### 181 ***T cells***

182 Generation of  $\alpha\beta$  T cells carrying a transgenic TCR recognizing an HLA-A2-restricted WT1-  
183 derived peptide were described elsewhere<sup>18</sup>. Briefly, TCR $\alpha$  and  $\beta$  chains were cloned from  
184 raised tetramer positive T cell clones. Subsequently, CD8<sup>+</sup>  $\alpha\beta$  TCR T cells were transduced  
185 using retroviral supernatant from Phoenix-Ampho packaging cells that were transfected with  
186 gag-pol, env, and pBullet retroviral constructs containing the cloned TCR genes.

187

### 188 ***Organoid-T cell co-culture and live-cell imaging***

189 Organoids stably transfected with H2B-mNeonGreen were split and digested a 5 to 7 days prior  
190 to co-culture and seeded at a density of 5000 cells per 10  $\mu$ L of BME (25,000 cells per well in  
191 a 12-well cell culture plate). Two days prior to co-culture, T cells were starved from IL-2. One  
192 day prior to co-culture, organoids were stimulated with IFN- $\gamma$  at indicated concentrations.

193

194 Prior to co-culturing, T cells were stained with Cell Proliferation Dye eFluor 450 (eBioscience)  
195 according to the manufacturer's instructions. Organoids were pulsed with TCR-specific  
196 peptide (ProImmune) for 2 hours at 37°C prior to co-culture. Organoids and T cells were  
197 harvested and taken up in T cell medium, supplemented with 10% BME, 100 IU/mL IL-2 and  
198 NucRed Dead 647 (Thermo Fischer). Where indicated, anti-PD1 blocking antibodies (2  
199  $\mu$ g/mL) were added to the co-culture. Cells were plated in glass-bottom 96-well plates and co-  
200 cultures were imaged using an SP8X confocal microscope (Leica).

201

### 202 ***Flow cytometry***

Bar-Ephraim, Kretzschmar et al.

203 APC-labelled pentamers to the EBV-derived, HLA-2:02 restricted peptide FLYALALLL  
204 (ProImmune) were used to sort pentamer<sup>+</sup> CD8<sup>+</sup> CD3<sup>+</sup> T cells from PBMCs isolated from  
205 buffycoats from healthy individuals. Cells were sorted as single cells into 96-well plates using  
206 a BD FACS Aria (BD Biosciences) cytometer. For flow cytometry, the following antibodies  
207 were used (all anti-human): CD8–PE (clone RPA-T8), CD45–PerCP-Cy5.5 (2D1), CD274  
208 (PD-L1)–APC (MIH1) (all BD Biosciences), CD279 (PD-1)–PE (EH12.2H7, Biolegend),  
209 HLA-A2–PE (BB7.2, Santa Cruz).

210

### 211 ***Quantitative polymerase chain reaction (qPCR)***

212 For qPCR analysis, RNA was isolated from organoids using the RNAeasy kit (QIAGEN)  
213 according to the manufacturer's protocol. PCR analysis was performed using the SYBR Green  
214 Reagent (Biorad). PCR reactions were performed in duplicate with a standard curve for every  
215 primer. Primers were designed using the NCBI primer design tool. Primers used in this study:  
216 *GAPDH* forward (GTC GGA GTC AAC GGA TT), *GAPDH* reverse (AAG CTT CCC GTT  
217 CTC AG), *HPRT* forward (GGC GTC GTG ATT AGT GAT), *HPRT* reverse (AGG GCT ACA  
218 ATG TGA TGG), *CD274* forward (TGC AGG GCA TTC CAG AAA GAT), *CD274* reverse  
219 (CCG TGA CAG TAA ATG CGT TCAG).

220

### 221 ***Transcriptional profiling***

222 Microarray analysis of biobank organoids was performed as described elsewhere<sup>12</sup>.

223

### 224 ***Enzyme linked immunosorbent assays (ELISA)***

225 Culture supernatants were kept at –20°C and ELISA was performed for indicated cytokines  
226 using ELISA MA Standard (Biolegend) according to manufacturer's protocol.

227

### 228 ***Cell viability assay***

229 Cell viability after co-cultures was assessed using CellTiter-Glo Luminescent cell viability  
230 assay (Promega), according to manufacturer's protocol.

231

### 232 ***Image analysis***

233 Image analysis was done using Imaris software package (Bitplane). In brief, threshold for  
234 positive staining was set on negative controls. A co-localization channel was made for H2B-  
235 neon and NucRed Dead 647 signals. Cell death was quantified as percentage of H2B-  
236 mNeonGreen<sup>+</sup> voxels co-localising with NucRed Dead signal.

Bar-Ephraim, Kretzschmar et al.

237

### 238 **Bioinformatics analysis**

239 Bioinformatics analysis of normalised gene-expression data from microarray experiments<sup>12</sup>  
240 was performed using standard packages (*i.e.* gplots) in R version 3.4.0 (R Foundation,  
241 <https://www.r-project.org>) and RStudio version 1.0.143 (<https://www.rstudio.com>).

242

### 243 **Statistical analysis**

244 All experiments were repeated at least three times unless otherwise indicated. All data were  
245 shown as mean  $\pm$  SEM. Statistical significance was analysed by either ANOVA or two-tailed  
246 Student's *t*-test using either Graphpad Prism 6 or Microsoft Excel 2010.

247

### 248 **References**

- 249 1. Ferlay, J. *et al.* GLOBOCAN 2012 v1.0, Cancer Incidence and Mortality Worldwide:  
250 IARC CancerBase No. 11. *International Agency for Research on Cancer* (2013).
- 251 2. Markowitz, S. D., Dawson, D. M., Willis, J. & Willson, J. K. Focus on colon cancer.  
252 *Cancer Cell* **1**, 233-236 (2002).
- 253 3. Vries, R. G., Huch, M. & Clevers, H. Stem cells and cancer of the stomach and intestine.  
254 *Mol Oncol* **4**, 373-384, doi:10.1016/j.molonc.2010.05.001 (2010).
- 255 4. Markowitz, S. D. & Bertagnolli, M. M. Molecular origins of cancer: Molecular basis  
256 of colorectal cancer. *N Engl J Med* **361**, 2449-2460, doi:10.1056/NEJMra0804588  
257 (2009).
- 258 5. Hanahan, D. & Weinberg, R. A. Hallmarks of cancer: the next generation. *Cell* **144**,  
259 646-674, doi:10.1016/j.cell.2011.02.013 (2011).
- 260 6. Junttila, M. R. & de Sauvage, F. J. Influence of tumour micro-environment  
261 heterogeneity on therapeutic response. *Nature* **501**, 346-354, doi:10.1038/nature12626  
262 (2013).
- 263 7. Gajewski, T. F., Schreiber, H. & Fu, Y. X. Innate and adaptive immune cells in the  
264 tumor microenvironment. *Nat Immunol* **14**, 1014-1022, doi:10.1038/ni.2703 (2013).
- 265 8. Dunn, G. P., Koebel, C. M. & Schreiber, R. D. Interferons, immunity and cancer  
266 immunoediting. *Nat Rev Immunol* **6**, 836-848, doi:10.1038/nri1961 (2006).
- 267 9. Zitvogel, L., Galluzzi, L., Smyth, M. J. & Kroemer, G. Mechanism of action of  
268 conventional and targeted anticancer therapies: reinstating immunosurveillance.  
269 *Immunity* **39**, 74-88, doi:10.1016/j.immuni.2013.06.014 (2013).



Bar-Ephraim, Kretzschmar et al.

- 270 10. Kretzschmar, K. & Clevers, H. Organoids: Modeling Development and the Stem Cell  
271 Niche in a Dish. *Dev Cell* **38**, 590-600, doi:10.1016/j.devcel.2016.08.014 (2016).
- 272 11. Drost, J. & Clevers, H. Organoids in cancer research. *Nat Rev Cancer* **18**, 407-418,  
273 doi:10.1038/s41568-018-0007-6 (2018).
- 274 12. van de Wetering, M. *et al.* Prospective derivation of a living organoid biobank of  
275 colorectal cancer patients. *Cell* **161**, 933-945, doi:10.1016/j.cell.2015.03.053 (2015).
- 276 13. Leone, P. *et al.* MHC class I antigen processing and presenting machinery:  
277 organization, function, and defects in tumor cells. *J Natl Cancer Inst* **105**, 1172-1187,  
278 doi:10.1093/jnci/djt184 (2013).
- 279 14. Fearon, E. R. & Vogelstein, B. A genetic model for colorectal tumorigenesis. *Cell* **61**,  
280 759-767 (1990).
- 281 15. Drost, J. *et al.* Sequential cancer mutations in cultured human intestinal stem cells.  
282 *Nature* **521**, 43-47, doi:10.1038/nature14415 (2015).
- 283 16. Fumagalli, A. *et al.* Genetic dissection of colorectal cancer progression by orthotopic  
284 transplantation of engineered cancer organoids. *Proc Natl Acad Sci U S A* **114**, E2357-  
285 E2364, doi:10.1073/pnas.1701219114 (2017).
- 286 17. Kryczek, I. *et al.* Cutting edge: IFN-gamma enables APC to promote memory Th17  
287 and abate Th1 cell development. *J Immunol* **181**, 5842-5846 (2008).
- 288 18. Kuball, J. *et al.* Facilitating matched pairing and expression of TCR chains introduced  
289 into human T cells. *Blood* **109**, 2331-2338, doi:10.1182/blood-2006-05-023069 (2007).
- 290 19. Sebestyen, Z. *et al.* RhoB Mediates Phosphoantigen Recognition by Vgamma9Vdelta2  
291 T Cell Receptor. *Cell Rep* **15**, 1973-1985, doi:10.1016/j.celrep.2016.04.081 (2016).
- 292 20. Dijkstra, K. K. *et al.* Generation of Tumor-Reactive T Cells by Co-culture of Peripheral  
293 Blood Lymphocytes and Tumor Organoids. *Cell* **174**, 1586-1598 e1512,  
294 doi:10.1016/j.cell.2018.07.009 (2018).
- 295 21. Sato, T. *et al.* Long-term expansion of epithelial organoids from human colon,  
296 adenoma, adenocarcinoma, and Barrett's epithelium. *Gastroenterology* **141**, 1762-  
297 1772, doi:10.1053/j.gastro.2011.07.050 (2011).
- 298 22. Bolhaqueiro, A. C. F. *et al.* Live imaging of cell division in 3D stem-cell organoid  
299 cultures. *Methods in cell biology* **145**, 91-106, doi:10.1016/bs.mcb.2018.03.016 (2018).

300

### 301 **Acknowledgements**

302 We thank T. Aarts, S. van den Brink, A. Cleven, T. Mizutani, M. Schiffler, M. van de Wetering  
303 for technical assistance and experimental advice, A. de Graaff and the Hubrecht Imaging

Bar-Ephraim, Kretzschmar et al.

304 Facility for help with microscopy, S. van der Elst, R. van den Linden and T. Poplonski for help  
305 with flow cytometry. This work was supported by the European Research Council (Advanced  
306 Grant ERC-AdG 67013-Organoid to H.C.) and a VENI grant from the Netherlands  
307 Organisation for Scientific Research (NWO-ZonMW, 016.166.140 to K.K.). This work is part  
308 of the Oncode Institute, which is partly funded by the Dutch Cancer Society. K.K. is a long-  
309 term fellow of the Human Frontier Science Program Organization (HFSPO, LT771/2015) and  
310 was a long-term fellow of the European Molecular Biology Organisation (EMBO, ALTF 839-  
311 2014).

312

### 313 **Author contributions**

314 Y.B.E. and K.K. designed, performed and analysed the experiments and wrote the manuscript.  
315 Y.B.E. performed image analysis. K.K. performed bioinformatics analysis. P.A., E.d.J. and  
316 K.E.B. assisted with experiments. J.D. generated cancer gene-mutant organoid lines. J.v.G.  
317 isolated tumour and normal tissue from resected material. A.P. and N.S. performed surgery.  
318 I.J.G., Z.S. and J.K. provided WT1 peptide and WT1 peptide-specific transgenic TCR  $\alpha\beta$  T  
319 cells. R.G.J.V. organised tissue collection. K.K. and H.C. acquired funding. H.C. supervised  
320 the project and wrote the manuscript. All of the authors commented on the manuscript.

321

Bar-Ephraim, Kretzschmar et al.

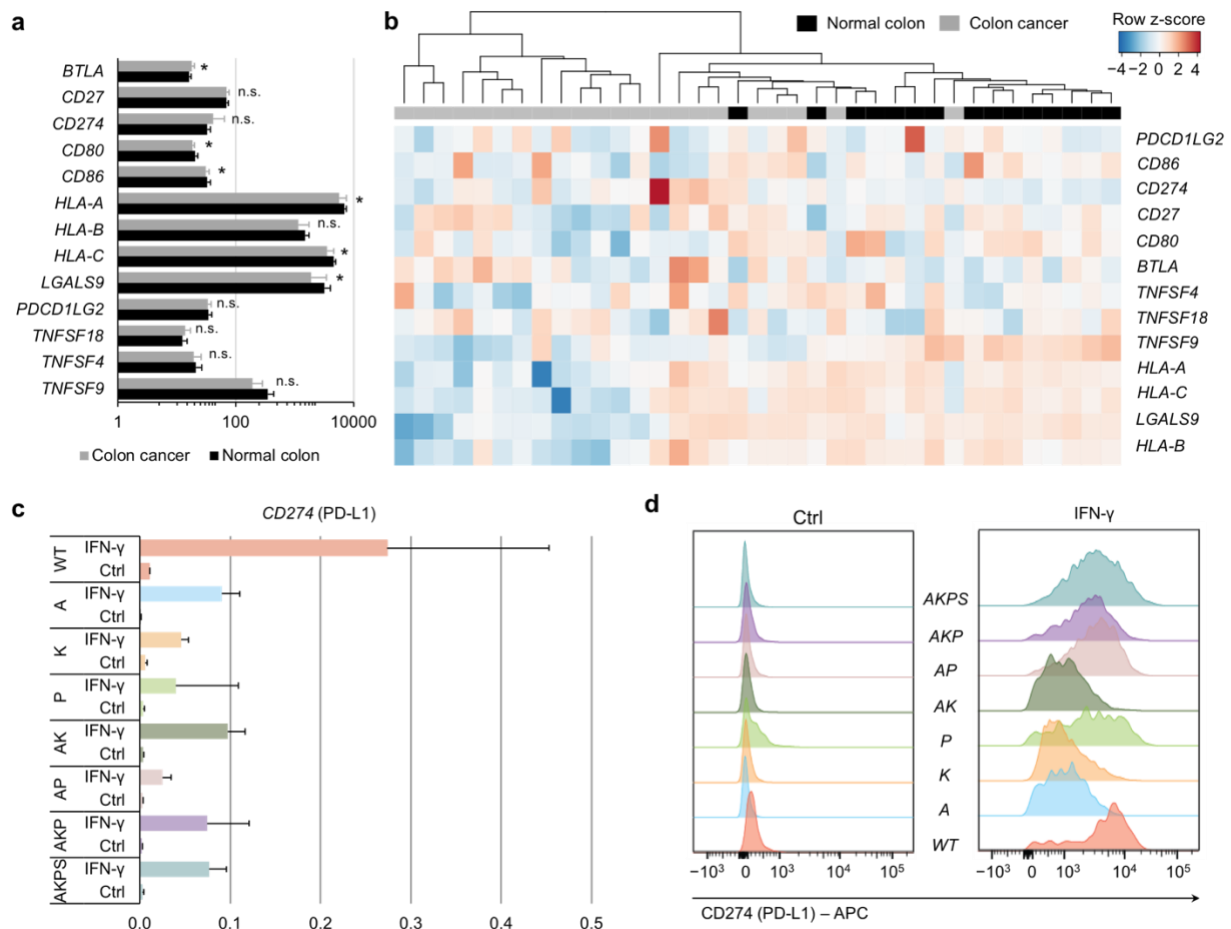

322

323

324

325

326

327

328

329

330

331

332

333

334

335

336

**Fig. 1 | CRC organoids express immunomodulatory molecules. a,b,** Normal colon and CRC organoid lines were generated in a patient-specific manner and RNA was extracted and analysed using Affymetrix single transcript microarrays. Average gene expression of different immunomodulators in normal colon and CRC organoid lines; n.s., non-significant; \*,  $p < 0.05$  (a). Hierarchical clustering of the individual normal colon and CRC organoid lines in the ‘living biobank’ displaying gene expression of selected immunomodulators. Color gradients represent z valued of each row (gene transcripts). **c-d,** Human colon organoid lines genetically engineered to carry one or more mutations found in CRCs. Expression levels of CD274 (PD-L1) in organoid lines (n = 2) at steady state (Ctrl) and upon stimulation with 20 ng/mL recombinant human IFN- $\gamma$  assessed by quantitative PCR (c) and flow cytometry (d). A,  $APC^{KO/KO}$ ; N.D., not detected; K,  $KRAS^{G12D/+}$ ; P,  $P53^{KO/KO}$ ; S,  $SMAD4^{KO/KO}$ , WT, wild-type.

Bar-Ephraim, Kretzschmar et al.

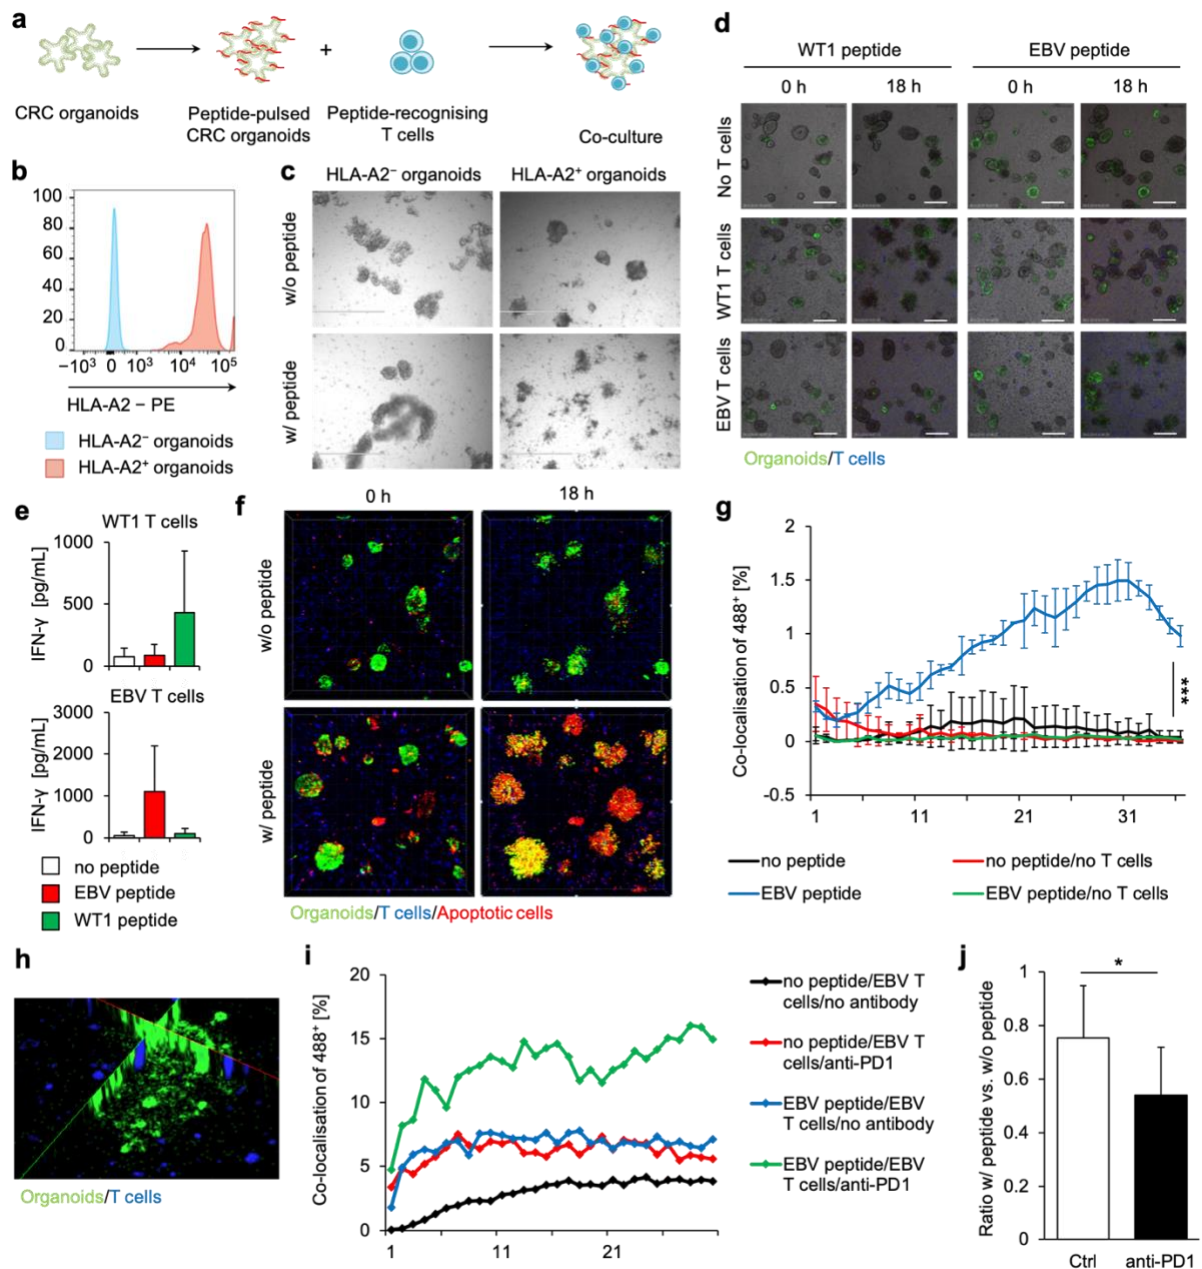

337

338 **Fig. 2 | CRC organoids as tools for assessment of antigen specific killing by CD8<sup>+</sup> T cells.**

339 **a**, Experimental scheme. **b**, Flow cytometry analysis of HLA-A2 expression in cloned HLA-

340 A2<sup>+</sup> and HLA-A2<sup>-</sup> lines. **c**, Brightfield images of CRC organoids co-cultured with WT1

341 peptide-specific T-cell receptor-specific transgenic T cells for 48 hours; scale bars: 1 mm. **d**,

342 Images showing peptide-pulsed HLA-A2<sup>+</sup> CRC organoids at the beginning and end of co-

343 culture with indicated peptide-specific T cells; scale bars: 70 μm. **e**, IFN-γ production by WT1

344 (top) and EBV (bottom) peptide-specific T cells as measured by ELISA of supernatants

345 collected after 18-hour co-culture with HLA-A2<sup>+</sup> CRC organoids pulsed with indicated

346 peptides. **f**, Live-cell imaging stills of an 18-hour co-culture experiment with EBV peptide-

Bar-Ephraim, Kretzschmar et al.

347 pulsed HLA-A2<sup>+</sup> CRC organoids co-cultured with an EBV-specific T-cell clone. **g**,  
348 Quantification of CRC organoid killing by specific T cells. Graphs are representative of  
349 multiple repeated experiments with either EBV peptide and EBV T-cell- or WT1 peptide and  
350 WT1 T-cell co-cultures. **h**, Representative projection image of T cells (blue) infiltrating a  
351 peptide-pulsed CRC organoid as recorded during the live-cell imaging experiments. **i**,  
352 Quantification of killing of IFN- $\gamma$  treated CRC organoids by specific T cells in either presence  
353 or absence of a blocking antibody against PD-1. Graphs are representative of multiple repeated  
354 experiments with either EBV peptide and EBV T-cell- or WT1 peptide and WT1 T-cell co-  
355 cultures. **j**, Quantification cell viability after 18 hours co-cultures of either peptide pulsed or  
356 non-pulsed HLA-A2<sup>+</sup> organoids with antigen specific T cells. Graphs represent ratio between  
357 peptide-pulsed and non-peptide pulsed conditions.  
358
